# Supplementary material for: Integrative Behavioral, Histological and Proteomics Profiling Identifies Cerebellar Drivers of Motor Dysfunction in a Rat Model of Hepatic Encephalopathy
Source: Research Square preprint supplement (doi:10.21203/rs.3.rs-6690143/v1), 2025-06-10
Supplement: Supplementary file 1 [file a9d44a939dde5849108d1e91.docx]

**Table 1. List of significantly differentially expressed proteins in the cerebellum of control vs MoHE rats**

| S.N. | Entry Name | Protein names | FC | log2(FC) | raw.pval |
| --- | --- | --- | --- | --- | --- |
| 1 | MFGM | Lactadherin | 3.1901 | 1.6736 | 0.000673 |
| 2 | RHEB | GTP-binding protein Rheb | 2.9792 | 1.5749 | 0.004033 |
| 3 | MPPB | Mitochondrial-processing peptidase subunit beta | 2.6333 | 1.3968 | 0.01181 |
| 4 | CRYL1 | Lambda-crystallin homolog | 2.3264 | 1.2181 | 0.006404 |
| 5 | CANB1 | Calcineurin subunit B type 1 | 1.9145 | 0.93695 | 0.020716 |
| 6 | SF3B4 | Splicing factor 3B subunit 4 | 1.8286 | 0.87077 | 0.019472 |
| 7 | HTRA1 | Serine protease HTRA1 | 1.8 | 0.84802 | 0.024387 |
| 8 | A1AT | Alpha-1-antiproteinase | 1.7366 | 0.79624 | 0.001198 |
| 9 | ATG3 | Ubiquitin-like-conjugating enzyme ATG3 | 1.6773 | 0.74614 | 0.035976 |
| 10 | KCAB1 | Voltage-gated potassium channel subunit beta-1 | 1.6639 | 0.73455 | 0.048315 |
| 11 | GSTM5 | Glutathione S-transferase Mu 5 | 1.6418 | 0.71529 | 0.015183 |
| 12 | GSTM7 | Glutathione S-transferase Mu 7 | 1.5992 | 0.67732 | 0.00719 |
| 13 | DMD | Dystrophin | 1.4803 | 0.56584 | 0.020541 |
| 14 | TPRKB | EKC/KEOPS complex subunit Tprkb | 1.4144 | 0.50015 | 0.037688 |
| 15 | PGTB2 | Geranylgeranyl transferase type-2 subunit beta | 1.4072 | 0.49278 | 0.003683 |
| 16 | PGP | Glycerol-3-phosphate phosphatase | 1.4035 | 0.48903 | 0.029335 |
| 17 | ARRB1 | Beta-arrestin-1 | 1.3985 | 0.48393 | 0.01854 |
| 18 | KCAB2 | Voltage-gated potassium channel subunit beta-2 | 1.3809 | 0.46563 | 0.044684 |
| 19 | CSN2 | COP9 signalosome complex subunit 2 | 1.3608 | 0.44446 | 0.002064 |
| 20 | PYGM | Glycogen phosphorylase, muscle form | 1.3454 | 0.42807 | 0.049787 |
| 21 | LKHA4 | Leukotriene A-4 hydrolase | 1.338 | 0.42004 | 0.039678 |
| 22 | GNAQ | Guanine nucleotide-binding protein G(q) subunit alpha | 1.3275 | 0.40874 | 0.037989 |
| 23 | GPDA | Glycerol-3-phosphate dehydrogenase [NAD (+)] | 1.3265 | 0.40766 | 0.001423 |
| 24 | ACY3 | N-acyl-aromatic-L-amino acid amidohydrolase | 1.3235 | 0.4044 | 0.028142 |
| 25 | CSN4 | COP9 signalosome complex subunit 4 | 1.3197 | 0.40018 | 0.041477 |
| 26 | PRVA | Parvalbumin alpha | 1.3069 | 0.38614 | 0.012423 |
| 27 | CTL2 | Choline transporter-like protein 2 | 1.2851 | 0.36183 | 0.001628 |
| 28 | G6PD | Glucose-6-phosphate 1-dehydrogenase | 1.2848 | 0.36157 | 0.044359 |
| 29 | MK10 | Mitogen-activated protein kinase 10 | 1.2832 | 0.35976 | 0.038903 |
| 30 | PPP6 | Serine/threonine-protein phosphatase 6 catalytic subunit | 1.2775 | 0.35332 | 0.047533 |
| 31 | PLPP | Chronophin | 1.2674 | 0.34188 | 0.022435 |
| 32 | HS90B | Heat shock protein HSP 90-beta | 1.253 | 0.32535 | 0.030229 |
| 33 | PDCD6 | Programmed cell death protein 6 | 1.2523 | 0.32462 | 0.037478 |
| 34 | FETUA | Fetuin-A | 1.252 | 0.32425 | 0.049319 |
| 35 | DNM1L | Dynamin-1-like protein | 1.2504 | 0.32236 | 0.036062 |
| 36 | APOD | Apolipoprotein D | 0.79349 | -0.33372 | 0.015146 |
| 37 | H2AY | Core histone macro-H2A.1 | 0.78904 | -0.34184 | 0.043834 |
| 38 | CPSF7 | Cleavage and polyadenylation specificity factor subunit 7 | 0.77703 | -0.36397 | 0.024295 |
| 39 | GTR3 | Solute carrier family 2 | 0.77594 | -0.36598 | 0.024871 |
| 40 | AT2A3 | Sarcoplasmic/endoplasmic reticulum calcium ATPase 3 | 0.77528 | -0.36721 | 0.047213 |
| 41 | IMPA3 | Golgi-resident adenosine 3',5'-bisphosphate 3'-phosphatase | 0.77229 | -0.37278 | 0.00717 |
| 42 | NAC2 | Sodium/calcium exchanger 2 | 0.76344 | -0.38942 | 0.016439 |
| 43 | AT2B1 | Plasma membrane calcium-transporting ATPase 1 | 0.75623 | -0.4031 | 0.013582 |
| 44 | CNR1 | Cannabinoid receptor 1 | 0.75519 | -0.40508 | 0.040945 |
| 45 | SSRP1 | FACT complex subunit SSRP1 | 0.73556 | -0.44308 | 0.02058 |
| 46 | PCP4 | Calmodulin regulator protein PCP4 | 0.7324 | -0.44929 | 0.047905 |
| 47 | SERPH | Serpin H1 | 0.71578 | -0.48242 | 0.027832 |
| 48 | H2A2A | Histone H2A type 2-A | 0.70161 | -0.51125 | 0.024316 |
| 49 | S25A3 | Solute carrier family 25-member 3 | 0.69669 | -0.52141 | 0.047368 |
| 50 | CERU | Ceruloplasmin | 0.6829 | -0.55025 | 0.00095 |
| 51 | HMCS1 | Hydroxymethylglutaryl-CoA synthase | 0.6613 | -0.59663 | 0.011944 |
| 52 | MSI1H | RNA-binding protein Musashi homolog 1 | 0.64834 | -0.62518 | 0.036443 |
| 53 | AT2B4 | Plasma membrane calcium-transporting ATPase 4 | 0.64337 | -0.63628 | 0.01534 |
| 54 | CXG2 | Gap junction gamma-2 protein | 0.63322 | -0.65921 | 0.041642 |
| 55 | TPM4 | Tropomyosin alpha-4 chain | 0.59061 | -0.75973 | 0.004585 |
| 56 | K2C8 | Keratin, type II cytoskeletal 8 | 0.58189 | -0.78118 | 0.004286 |
| 57 | A1M | Alpha-1-macroglobulin | 0.57948 | -0.78718 | 0.007636 |
| 58 | GRM4 | Metabotropic glutamate receptor 4 | 0.53935 | -0.89069 | 0.022482 |
| 59 | CO3 | Complement C3 | 0.53808 | -0.8941 | 0.004654 |
| 60 | SPA3L | Serine protease inhibitor A3L | 0.4141 | -1.2719 | 0.006742 |
| 61 | EST1C | Carboxylesterase 1C | 0.3586 | -1.4795 | 0.002827 |
| 62 | SPA3K | Serine protease inhibitor A3K | 0.28515 | -1.8102 | 0.028937 |
| 63 | GRM2 | Metabotropic glutamate receptor 2 | 0.20689 | -2.2731 | 0.000386 |
| 64 | MUG1 | Murinoglobulin-1 | 0.18193 | -2.4585 | 3.25E-06 |
| 65 | A1I3 | Alpha-1-inhibitor 3 | 0.11571 | -3.1115 | 0.000993 |
